# Supplementary material
Source: publisher figshare collection journal article supplement (https://gsapubs.figshare.com/ndownloader/files/22740761)
Supplement: Supplementary file 1 [file 22740761]

DAVIS ET AL.

**EOCENE MAGMATISM AT TWO BUTTES, COLORADO**

Geological Society of America Bulletin, December 1996

Author Footnote: \*Present addresses: Davis: Department of Geology, Idaho State University, Pocatello, Idaho 83209-8072; Walker: Department of Geological Sciences, Brown University, Box 1846, Providence, Rhode Island 02912; and Borg: SN4/Planetary Science Division, NASA Johnson Space Center, Houston, TX 77058.

Data Repository item 9669

**CHEMICAL COMPOSITIONS OF SELECTED ROCKS AT TWO BUTTES,  
COLORADO**

Table A1 contains averages of replicate analyses of rocks (2 to 11) from Two Buttes, Colorado. Complete analytical details and replicate analyses are in Appendices A, B, and E of Davis (1993), but here we briefly describe the analytical methods used for the various elements and samples.  $\text{SiO}_2$ ,  $\text{TiO}_2$ ,  $\text{Al}_2\text{O}_3$ ,  $\text{Fe}_2\text{O}_3(\text{total})$ ,  $\text{MnO}$ ,  $\text{MgO}$ ,  $\text{CaO}$ ,  $\text{Na}_2\text{O}$ ,  $\text{K}_2\text{O}$ , and  $\text{P}_2\text{O}_5$  were determined by inductively coupled plasma atomic emission spectrometry (ICP-AES).  $\text{FeO}$  was determined by titration. In addition,  $\text{P}_2\text{O}_5$ ,  $\text{TiO}_2$ , and  $\text{Fe}_2\text{O}_3(\text{total})$  abundances were cross checked by colorimetry or atomic absorption spectroscopy (AA). Total  $\text{H}_2\text{O}$  was determined by the Penfield method and absorbed  $\text{H}_2\text{O}$  was determined by difference.  $\text{CO}_2$  was determined by difference using an adsorption technique developed by G. K. Hoops [date].

Sr, Ba, and Ni were determined by X-ray fluorescence spectrometry (XRF) and ICP-AES, Rb and Zr were obtained by XRF, and Cr by ICP-AES at the University of Texas (UT) Geology Department. Samples 28, 45, 81, and 88a were analyzed for Ni, Cr, Ba, Rb, Sr, Zr, Y, and Nb by XRF at Washington State University (WSU). Y for sample 88a was also determined by ICP-AES at UT. Th, Ta, La, Ce, Nd, Sm, Hf, Tb, Yb, Eu, and Lu were determined by thermal instrumental neutron activation analysis (INAA). Samples were irradiated at Texas A&M University and gamma rays were counted at the UT Nuclear Engineering Teaching Laboratory. Ta reported for samples 88a and 45 was determined by epithermal INAA: 45 and 88a were irradiated at the Oregon State University Radiation Center and gamma ray spectral data were obtained in the

Idaho State University Geology NAA laboratory. Ce/Yb is normalized to average C1 chondrite values of Anders and Grevesse (1989).

Estimates of accuracy and precision are shown in Table A2. As an indication of accuracy, averaged values for international standard BHVO-1 are presented. Precision is estimated using the standard deviation ( $1\sigma$ ) of replicate analyses of BHVO-1 for SiO<sub>2</sub>, TiO<sub>2</sub>, Al<sub>2</sub>O<sub>3</sub>, Fe<sub>2</sub>O<sub>3</sub>, MnO, MgO, CaO, Na<sub>2</sub>O, K<sub>2</sub>O, and P<sub>2</sub>O<sub>5</sub>. Precision estimates for Y and Nb were provided by WSU, and were determined by replicate analyses of BCR-P. For elements determined by INAA, the values for BHVO-1 do not adequately represent “true” accuracy. Two samples of BHVO-1 were submitted with the Two Buttes rock samples; one to be used as a primary standard and the other as an unknown. La and Sm for the BHVO-1 sample submitted as an unknown are apparently high and Yb is low (Table A2). We have confidence, however, in the ranges in Yb, La, and Sm that we obtained for the Two Buttes rocks; they are almost the same as those obtained by Gibson et al. (1993) (Yb, 1.95 to 3.85 ppm; La, 50 to 130 ppm; Sm, 9.80 to 18.95). Precision estimates for elements determined by INAA are based on counting statistics with one exception; for Ta determined by epithermal neutron activation (samples 45 and 88a), an error estimate is  $\pm 0.011$  ppm, based on accuracy and counting statistics.

Precision and accuracy estimations for trace elements we determined by XRF and ICP-AES are not straightforward. Cr, Ni, Sr, and Ba values presented here are a combination of replicate analyses by XRF and ICP-AES. Rb and Zr values for several samples are a combination of replicate analyses by XRF from UT and WSU. BHVO-1 was not used as a secondary standard for the XRF determinations, although it was for the ICP-AES determinations. WSU used BCR-P as a secondary standard to check precision. Rather than combine the precision estimates from the different laboratories or methods, we discuss precision for each. The agreement between methods and laboratories is very good, which is why the values for these elements were averaged (Table A3). For those samples where XRF and ICP-AES values were averaged, the number of replicate analyses by ICP-AES outweighs those by XRF, except for sample 45, for which the opposite is true. For Sr, Rb, Zr, Ba, and Ni determined by XRF at UT, precision based on the standard

deviation ( $1\sigma$ ) of replicate analyses of sample 45 (4 to 11 analyses) is 12, 3, 8, 37, and 8 ppm, respectively. For Cr, Ni, Sr, and Ba determined by ICP-AES at UT, precision based on the standard deviation ( $1\sigma$ ) of replicate analysis of BHVO-1 (6 analyses) is 22, 9.5, 9, and 35 ppm, respectively. Analyses for rocks 28, 45, and 88a have single XRF values from WSU averaged in for Ni, Cr, Ba, Rb, Sr, Zr, Y, and Nb (values for Nb are solely XRF). Values for Y were determined by XRF (rocks 28, 45, 81, and 88a at WSU) and ICP-AES (88a). We have no precision estimate for Y determined by ICP-AES. WSU provided the following precision estimates in ppm based upon standard deviation ( $1\sigma$ ) of replicate analyses of BCR-P: Ni, 0.32; Cr, 1.83; Ba, 12.64; Rb, 0.84; Sr, 2.32; Zr, 0.70; Y, 0.52; and Nb, 0.521.

## **PROCEDURES FOR SAMPLE PREPARATION FOR ISOTOPIC ANALYSIS**

Comprehensive details of analytical procedures for Rb, Sr, and Nd were given by Davis (1993), and for Pb by Borg (1995); important analytical details are footnoted here in Table 2. Rb, Sr, Sm, Nd, and Pb were separated using standard cation/anion exchange techniques. Rb concentrations were determined using an automated NBS-type single-collector mass spectrometer, whereas Sr, Sm, Nd, and Pb isotopic ratios and Sr, Sm, and Nd concentrations were determined statically on a Finnigan MAT 261 multicollector mass spectrometer (Table 2). Pyroxenes were first sonically cleaned in cold distilled H<sub>2</sub>O and dried, leached in 2N HNO<sub>3</sub> for 15 min on a hot plate, and finally rinsed in double-distilled H<sub>2</sub>O prior to digestion and analysis. Nd error is within 0.3  $\epsilon_{Nd}$ , and Sr isotopic ratios are probably accurate to within  $2 \times 10^{-5}$ . A typical Pb blank of 62 pg per analysis was obtained for analyses reported herein.

To concentrate phlogopite for K-Ar analysis, cleaned 60–80 mesh fractions of crushed rock were run across a small vibrating mica table and a hand magnet was drawn across and through the samples to remove large or strongly magnetic grains. Samples were resieved through 115 mesh to rid the sample of fines. The remaining fraction was then run through Frantz isodynamic separators. The least and most magnetic fractions at low amperage (0.1–0.16 amps) were

removed. A very small split was taken and checked by X-ray diffraction for alteration to chlorite or broadening of peaks. The patterns for splits from samples reported here showed no broadening of phlogopite peaks or alteration to another phyllosilicate.

Table A1. Major, minor (wt%) and trace (ppm) element compositions of Two Buttes rocks.

| sample                                                                                                                                      | 88a   | 45    | 81    | 70    | 59     | 28     | 31    | 105  |
|---------------------------------------------------------------------------------------------------------------------------------------------|-------|-------|-------|-------|--------|--------|-------|------|
| SiO <sub>2</sub>                                                                                                                            | 47.6  | 48.3  | 50.2  | 49.1  | 52.4   | 55.1   | 53.9  | 57.1 |
| TiO <sub>2</sub>                                                                                                                            | 1.01  | 0.98  | 1.09  | 0.97  | 1.16   | 0.94   | 1.01  | 0.86 |
| Al <sub>2</sub> O <sub>3</sub>                                                                                                              | 9.50  | 9.80  | 11.3  | 10.9  | 13.8   | 14.0   | 15.7  | 16.6 |
| Fe <sub>2</sub> O <sub>3</sub>                                                                                                              | 2.66  | 2.39  | 2.74  | 1.78  | 6.23   | 7.59   | 4.55  | 5.62 |
| FeO                                                                                                                                         | 5.84  | 5.22  | 4.66  | 5.37  | 2.80   | n.d.   | 2.33  | 1.07 |
| MnO                                                                                                                                         | 0.14  | 0.13  | 0.13  | 0.14  | 0.10   | 0.13   | 0.23  | 0.16 |
| MgO                                                                                                                                         | 16.4  | 17.9  | 13.2  | 15.5  | 5.91   | 5.96   | 2.72  | 1.83 |
| CaO                                                                                                                                         | 8.52  | 7.44  | 8.57  | 7.02  | 5.32   | 5.69   | 5.23  | 3.45 |
| Na <sub>2</sub> O                                                                                                                           | 1.82  | 1.98  | 2.30  | 2.29  | 2.50   | 3.34   | 2.05  | 4.27 |
| K <sub>2</sub> O                                                                                                                            | 3.81  | 3.84  | 4.19  | 4.50  | 6.29   | 5.94   | 7.64  | 6.24 |
| P <sub>2</sub> O <sub>5</sub>                                                                                                               | 0.38  | 0.27  | 0.33  | 0.30  | 0.49   | 0.40   | 0.43  | 0.29 |
| CO <sub>2</sub>                                                                                                                             | 0.18  | 0.00  | 0.08  | 0.23  | 0.58   | 0.42   | 1.37  | 0.51 |
| H <sub>2</sub> O <sup>+</sup>                                                                                                               | 1.22  | 1.08  | 0.72  | 1.28  | 1.85   | 1.19   | 1.51  | 1.14 |
| H <sub>2</sub> O <sup>-</sup>                                                                                                               | 0.20  | 0.20  | 0.13  | 0.22  | 0.67   | 0.25   | 0.35  | 0.42 |
| Total                                                                                                                                       | 99.36 | 99.48 | 99.67 | 99.66 | 100.08 | 100.99 | 99.05 | 99.6 |
| recalculated analyses (Fe <sub>2</sub> O <sub>3</sub> = 0.15 * FeO total) and mg = Mg <sup>2+</sup> /(Mg <sup>2+</sup> + Fe <sup>2+</sup> ) |       |       |       |       |        |        |       |      |
| FeO                                                                                                                                         | 6.99  | 6.26  | 6.06  | 5.92  | 7.15   | 5.81   | 5.46  | 5.21 |
| Fe <sub>2</sub> O <sub>3</sub>                                                                                                              | 1.24  | 1.11  | 1.07  | 1.05  | 1.26   | 1.02   | 0.96  | 0.92 |
| mg                                                                                                                                          | 80.7  | 83.6  | 79.5  | 82.3  | 59.6   | 64.7   | 47.0  | 38.5 |
| Cr                                                                                                                                          | 936   | 875   | 580   | 728   | 251    | 232    | 68    | 42   |
| Ni                                                                                                                                          | 543   | 498   | 276   | 405   | 83     | 113    | 29    | 24   |
| Rb                                                                                                                                          | 100   | 119   | 137   | 132   | 151    | 146    | 201   | 142  |
| Sr                                                                                                                                          | 666   | 664   | 758   | 832   | 418    | 413    | 1353  | 2014 |
| Y                                                                                                                                           | 22.5  | 21.0  | 26    | -     | -      | 36.0   | -     | -    |
| Zr                                                                                                                                          | 150   | 148   | 186   | 160   | 294    | 297    | 675   | 501  |
| Nb                                                                                                                                          | 11.7  | 10.6  | 13.7  | -     | -      | 22.7   | -     | -    |
| Ba                                                                                                                                          | 990   | 1104  | 1097  | 1164  | 1689   | 1181   | 2681  | 3717 |
| La                                                                                                                                          | 36.1  | 22.2  | 41.3  | 40.6  | 67.3   | 71.2   | 198.7 | 94.4 |
| Ce                                                                                                                                          | 79.4  | 65.4  | 86.0  | 78.3  | 142    | 141    | 262   | 271  |
| Nd                                                                                                                                          | 39.0  | 32.0  | 54.9  | 70.1  | 36.3   | 63.1   | 85.2  | 88.2 |
| Sm                                                                                                                                          | 9.16  | 4.83  | 8.54  | 7.77  | 12.0   | 12.0   | 27.7  | 12.7 |
| Eu                                                                                                                                          | 2.40  | 1.57  | 2.35  | 2.00  | 3.10   | 2.93   | 5.21  | 4.00 |
| Tb                                                                                                                                          | 1.10  | 0.79  | 1.09  | 0.74  | 1.34   | 1.22   | 1.76  | 1.70 |
| Yb                                                                                                                                          | 1.92  | 1.10  | 1.63  | 2.39  | 1.76   | 2.15   | 3.52  | 2.44 |
| Lu                                                                                                                                          | 0.28  | 0.19  | 0.28  | 0.31  | 0.33   | 0.46   | 0.28  | 0.46 |
| Hf                                                                                                                                          | 4.07  | 3.30  | 5.64  | 4.86  | 7.65   | 8.20   | 13.3  | 10.5 |
| Ta                                                                                                                                          | 0.73  | 0.63  | 2.31  | 0.69  | 1.70   | 1.40   | 2.52  | 2.14 |
| Th                                                                                                                                          | 5.50  | 4.85  | 7.50  | 6.67  | 14.4   | 14.5   | 28.2  | 28.8 |
| (Ce/Yb) <sub>n</sub>                                                                                                                        | 11.2  | 16.1  | 14.3  | 8.9   | 21.8   | 17.7   | 20.1  | 30.0 |

Table A2. Precision and accuracy estimation.

| sample                         | Our<br>Averaged<br>BHVO-1 | Recommended<br>BHVO-1 | standard<br>deviation<br>(# of analyses) |
|--------------------------------|---------------------------|-----------------------|------------------------------------------|
| SiO <sub>2</sub>               | 50.3                      | 49.9                  | 0.66 (12)                                |
| TiO <sub>2</sub>               | 2.72                      | 2.71                  | 0.17 (6)                                 |
| Al <sub>2</sub> O <sub>3</sub> | 13.9                      | 13.8                  | 0.07 (12)                                |
| Fe <sub>2</sub> O <sub>3</sub> | 2.24                      | 2.82                  | 0.27 (12)                                |
| FeO                            | 8.78                      | 8.58                  | (1)                                      |
| MnO                            | 0.17                      | 0.17                  | 0.01 (6)                                 |
| MgO                            | 7.14                      | 7.23                  | 0.77 (12)                                |
| CaO                            | 11.38                     | 11.4                  | 1.01 (12)                                |
| Na <sub>2</sub> O              | 2.27                      | 2.26                  | 0.12 (6)                                 |
| K <sub>2</sub> O               | 0.54                      | 0.52                  | 0.10 (6)                                 |
| P <sub>2</sub> O <sub>5</sub>  | 0.27                      | 0.27                  | 0.03 (6)                                 |
| Cr                             | 293                       | 289                   |                                          |
| Ni                             | 122                       | 121                   |                                          |
| Rb                             | †                         |                       |                                          |
| Sr                             | 381                       | 403                   |                                          |
| Y                              | ††                        |                       | 0.52                                     |
| Zr                             | †                         |                       |                                          |
| Nb                             | ††                        |                       | 0.52                                     |
| Ba                             | 154                       | 139                   |                                          |
| La                             | 19.9                      | 15.8                  | 0.8 (1)                                  |
| Ce                             | 37.7                      | 39                    | 8 (1)                                    |
| Nd                             | 26.2                      | 25.2                  | 18 (1)                                   |
| Sm                             | 7.05                      | 6.2                   | 0.10 (1)                                 |
| Eu                             | 1.92                      | 2.06                  | 0.08 (1)                                 |
| Tb                             | 0.90                      | 0.96                  | 0.04 (1)                                 |
| Yb                             | 1.62                      | 2.02                  | 0.50 (1)                                 |
| Lu                             | 0.26                      | 0.291                 | 0.07 (1)                                 |
| Hf                             | 4.05                      | 4.38                  | 0.70 (1)                                 |
| Ta                             | 1.22                      | 1.23                  | 0.06 (1)                                 |
| Th                             | 1.02                      | 1.08                  | 0.15 (1)                                 |

**Note:** BHVO-1 values for major oxides are averages of repeated analyses of international standard BHVO-1 digested and analyzed at the same time as Two Buttes samples. The standard deviation of these analyses is given as an estimate of precision. Secondary standards other than BHVO-1 were used to examine accuracy and precision for FeO, CO<sub>2</sub>, H<sub>2</sub>O<sup>-</sup>, H<sub>2</sub>O<sup>+</sup>, Rb, Y, Zr, and Nb. †Secondary standard, BPR-5 (Roden, 1981), was used: Roden obtained 127 ppm Rb and 359 ppm Zr. We obtained averages of 122 ppm Rb and 350 ppm Zr. †† Precision is based upon replicate analysis of BCR-P at Washington State University. Recommended values for BHVO-1 are from Govindaraju (1989).

| Table A3. Comparison of trace element analyses (ppm) obtained by XRF and ICP-AES by different laboratories. |     |      |      |     |      |     |      |      |      |
|-------------------------------------------------------------------------------------------------------------|-----|------|------|-----|------|-----|------|------|------|
| Sample                                                                                                      | 45  | 45   | 45   | 88a | 88a  | 88a | 28   | 28   | 28   |
| Lab.                                                                                                        | WSU | UT   | UT   | WSU | UT   | UT  | WSU  | UT   | UT   |
|                                                                                                             | XRF | XRF  | ICP  | XRF | XRF  | ICP | XRF  | XRF  | ICP  |
| Rb                                                                                                          | 116 | 119  |      | 99  | 100  |     | 150  | 146  |      |
| Sr                                                                                                          | 655 | 656  | 671  | 661 | 665  | 667 | 416  | 420  | 406  |
| Zr                                                                                                          | 154 | 142  |      | 155 | 145  |     | 289  | 305  |      |
| Ba                                                                                                          | 964 | 1115 | 1094 | 840 | 1074 | 906 | 1183 | 1192 | 1170 |
| Ni                                                                                                          | 487 | 483  | 513  | 515 | 529  | 557 | 109  | 102  | 123  |

**Note:** WSU is Washington State University, UT is The University of Texas.

Table A4: Selected Cr-rich and "salitic" pyroxene analyses.

| Sample                         | 31s  | 31s  | 45   | 45   |
|--------------------------------|------|------|------|------|
| SiO <sub>2</sub>               | 50.4 | 49.0 | 48.3 | 52.1 |
| TiO <sub>2</sub>               | 0.38 | 1.13 | 1.44 | 0.54 |
| Al <sub>2</sub> O <sub>3</sub> | 2.54 | 3.35 | 4.92 | 2.08 |
| FeO*                           | 12.2 | 9.14 | 7.07 | 0.96 |
| Cr <sub>2</sub> O <sub>3</sub> | 0.00 | 0.00 | 0.04 | 3.49 |
| MnO                            | 0.48 | 0.32 | 0.11 | 0.10 |
| MgO                            | 10.5 | 12.3 | 14.3 | 16.5 |
| CaO                            | 21.0 | 22.5 | 22.8 | 23.6 |
| Na <sub>2</sub> O              | 1.66 | 0.84 | 0.30 | 0.21 |
| Total                          | 99.2 | 98.6 | 99.3 | 99.6 |

cations normalized to 4

|                    |       |       |       |       |
|--------------------|-------|-------|-------|-------|
| Si                 | 1.907 | 1.854 | 1.797 | 1.911 |
| Al <sup>IV</sup>   | 0.011 | 0.032 | 0.040 | 0.089 |
| Al <sup>VI</sup>   | 0.093 | 0.146 | 0.203 | 0.001 |
| Ti                 | 0.020 | 0.003 | 0.013 | 0.015 |
| Cr                 | 0.000 | 0.000 | 0.001 | 0.028 |
| Fe <sup>3+</sup>   | 0.173 | 0.140 | 0.130 | 0.045 |
| Fe <sup>2+</sup>   | 0.215 | 0.149 | 0.090 | 0.062 |
| Mn                 | 0.015 | 0.010 | 0.003 | 0.003 |
| Mg <sup>VI</sup>   | 0.566 | 0.665 | 0.722 | 0.846 |
| Mg <sup>VIII</sup> | 0.024 | 0.028 | 0.069 | 0.058 |
| Ca                 | 0.854 | 0.910 | 0.910 | 0.927 |
| Na                 | 0.122 | 0.062 | 0.021 | 0.015 |

**Note:** Pyroxenes analyzed using a JEOL 733 superprobe operated at 15 kv, with sample currents between 30 and 45 nA on brass, count times of 40 to 70 seconds for minor and trace elements and minimum beam diameters. Estimates of precision and accuracy are in Davis (1993) along with descriptions of standards used. Analyses for sample 31 are from one grain with "simple" zoning. Analyses for sample 45 are from different zones in one oscillatory zoned pyroxene.



## REFERENCES CITED

- Alibert, C., Michard, A., and Albarede, F., 1986, Isotope and trace element geochemistry of Colorado Plateau volcanics: *Geochimica et Cosmochimica Acta*, v. 50, p. 2735–2750.
- Anders, E., and Grevesse, N., 1989, Abundances of the elements: Meteoritic and solar: *Geochimica et Cosmochimica Acta*, v. 53, p. 197–214.
- Armstrong, R. L., 1969, K-Ar dating of laccolithic centers of the Colorado Plateau and vicinity: *Geological Society of America Bulletin*, v. 80, p. 2081–2086.
- Armstrong, R. L., and Ward, P., 1991, Evolving geographic patterns of Cenozoic magmatism in the North American Cordillera: The temporal and spatial association of magmatism and metamorphic core complexes: *Journal of Geophysical Research*, v. 96, p. 13 201–13 224.
- Arndt, N. T., and Goldstein, S. L., 1987, Use and abuse of crust-formation ages: *Geology*, v. 15, p. 893–895.
- Ball, T. T., and Farmer, G. L., 1991, Identification of 2.0 to 2.4 Ga Nd model age crustal material in the Cheyenne belt, southeastern Wyoming: Implications for Proterozoic accretionary tectonics at the southern margin of the Wyoming craton: *Geology*, v. 19, p. 360–363.
- Bennett, V. C., and DePaolo, D. J., 1987, Proterozoic crustal history of the western United States as determined by neodymium isotopic mapping: *Geological Society of America Bulletin*, v. 99, p. 674–685.
- Bickford, M. E., 1988, The accretion of Proterozoic crust in Colorado: Igneous, sedimentary, deformational, and metamorphic history, *in* Ernst, W. G., ed., *Metamorphism and crustal evolution of the western U. S.*: Englewood Cliffs, New Jersey, Prentice-Hall, p. 411–430.
- Bird, P., 1988, Formation of the Rocky Mountains, western United States: A continuum computer model: *Science*, v. 239, p. 1501–1507.
- Borg, L., 1995, Origin and evolution of magmas from the Lassen region of the southernmost Cascades [Ph.D. dissert.]: Austin, University of Texas, 228 p.
- Carlson, R. W., and Irving, A. J., 1994, Depletion and enrichment history of subcontinental lithospheric mantle: An Os, Sr, Nd, and Pb isotopic study of ultramafic xenoliths from the northwestern Wyoming Craton: *Earth and Planetary Sciences*, v. 126, p. 457–472.

- Chapin, C. E., and Cather, S. M., 1994, Tectonic setting of the axial basins of the northern and central Rio Grande rift, *in* Keller, G. R., and Cather, S. M., eds., Basins of the Rio Grande Rift: Structure, stratigraphy, and tectonic setting: Geological Society of America Special Paper 291, p. 5–25.
- Coney, P. J., and Reynolds, S. J., 1977, Cordilleran Benioff zones: *Nature*, v. 270, p. 403–406.
- Davis, L. L., 1993, Potassic, mafic rocks at Two Buttes [Ph.D. dissert.]: Austin, University of Texas, 312 p.
- Davis, L. L., and Smith, D., 1991, Significance of Ni-rich olivine in minette [abs.]: *Eos* (Transactions, American Geophysical Union), v. 72, p. 516.
- Davis, L. L., and Smith, D., 1993, Ni-rich olivine in minettes from southeastern Colorado: A connection between potassic melts from the mantle and low Ni partition coefficients: *Geochimica et Cosmochimica Acta*, v. 57, p. 123–129.
- Davis, L. L., McDowell, F. W., Smith, D., and Walker, N. W., 1991, Potassic, mafic rocks at Two Buttes, CO [abs.]: *Eos* (Transactions, American Geophysical Union), v. 72, p. 295.
- DePaolo, D. J., 1981, Neodymium isotopes in the Colorado Front Range and crust-mantle evolution in the Proterozoic: *Nature*, v. 291, p. 193–196.
- DePaolo, D. J., and Wasserburg, G. J., 1976, Nd isotopic variations and petrogenetic models: *Geophysical Research Letters*, v. 3, p. 249–252.
- Dickinson, W. R., and Hatherton, T., 1967, Andesitic volcanism and seismicity around the Pacific: *Science*, v. 157, p. 801–803.
- Dickinson, W. R., and Snyder, W. S., 1978, Plate tectonics of the Laramide orogeny, *in* Matthews, V., II, ed., Laramide folding associated with basement block faulting in the western United States: Geological Society of America Memoir 151, p. 355–366.
- Dickinson, W. R., Klute, M. A., Hayes, M. J., Janecke, S. U., Lundin, E. R., McKittrick, M. A., and Olivares, M. D., 1988, Paleogeographic and paleotectonic setting of Laramide sedimentary basins in the central Rocky Mountains region: *Geological Society of America Bulletin*, v. 100, p. 1023–1039.
- Dudás, F. Ö., 1991, Geochemistry of igneous rocks from the Crazy Mountains, Montana, and tectonic models for the Montana alkalic province: *Journal of Geophysical Research*, v. 96, 13 261–13 277.
- Dudás, F. Ö., Carlson, R. W., and Eggler, D. H., 1987, Regional Middle Proterozoic enrichment of the subcontinental mantle source of igneous rocks from central Montana: *Geology*, v. 15, p. 22–25.

- Ehrenberg, S. N., 1982, Rare earth element geochemistry of garnet lherzolite and megacrystalline nodules from minette of the Colorado Plateau province: *Earth and Planetary Science Letters*, v. 57, p. 191–210.
- Esperanca, S., Carlson, R. W., and Shirey, S. B., 1988, Lower crustal evolution under central Arizona: Sr, Nd and Pb isotopic and geochemical evidence from the mafic xenoliths of Camp Creek: *Earth and Planetary Science Letters*, v. 90, p. 26–40.
- Faure, G., 1986, *Principles of isotope geology* (second edition): New York, John Wiley & Sons, 589 p.
- Foley, S., 1992, Vein-plus-wall-rock melting mechanisms in the lithosphere and the origin of potassic alkaline magmas: *Lithos*, v. 28, p. 435–453.
- Fraser, K. J., Hawkesworth, C. J., Erlank, A. J., Mitchell, R. H., and Scott-Smith, B. H., 1985/86, Sr, Nd and Pb isotope and minor element geochemistry of lamproites and kimberlites: *Earth and Planetary Science Letters*, v. 76, p. 57–70.
- Gibson, S. A., Thompson, R. N., Mitchell, J. G., Dickin, A. P., Morrison, M. A., and Hendry, G. L., 1991, Geochemical and petrographic evidence for high Mg-ultrapotassic magmas in SE Colorado, USA: [city, publisher], *Fifth International Kimberlite Conference, Araxá, Brazil, Extended Abstracts*, p. 136–138.
- Gibson, S. A., Thompson, R. N., Leat, P. T., Dickin, A. P., Morrison, M. A., Hendry, G. L., and Mitchell, J. G., 1992, Asthenosphere-derived magmatism in the Rio Grande rift, western USA: Implications for continental break-up, *in* Storey, B. C., Alabaster, T., and Pankhurst, R. J., eds., *Magmatism and the causes of continental breakup*: London, Geological Society Special Publication 68, p. 61–89.
- Gibson, S. A., Thompson, R. N., Leat, P. T., Morrison, M. A., Hendry, G. L., Dickin, A. P., and Mitchell, J. G., 1993, Ultrapotassic magmas along the flanks of the Oligo-Miocene Rio Grande Rift, USA: Monitors of the zone of lithospheric mantle extension and thinning beneath a continental rift: *Journal of Petrology*, v. 34, p. 187–228.
- Gilbert, G. K., 1896, Laccolites in southeastern Colorado: *Journal of Geology*, v. 4, p. 816–825.
- Govindaraju, K., 1989, 1989 compilation of working values and sample descriptions for 272 geostandards: *Geostandards Newsletter*, v. 13, 113 p.
- Grand, S. P., 1987, Tomographic inversion for shear velocity beneath the North American plate: *Journal of Geophysical Research*, v. 92, p. 14 065–14 090.

- Gregory, K. M., and Chase, C. G., 1992, Tectonic significance of paleobotanically estimated climate and altitude of the late Eocene erosion surface, Colorado: *Geology*, v. 20, p. 581–585.
- Gregory, K. M., and Chase, C. G., 1994, Tectonic and climatic significance of a late Eocene low-relief, high-level geomorphic surface, Colorado: *Journal of Geophysical Research*, v. 99, p. 20 141–20 160.
- Halvorson, D. L., 1980, Geology and petrology of the Devils Tower, Missouri Buttes, and Barlow Canyon area, Crook County, Wyoming [Ph.D. dissert.]: Grand Forks, University of North Dakota, 218 p.
- Hart, S. R., 1984, A large-scale isotope anomaly in the Southern Hemisphere mantle: *Nature*, v. 309, p. 753–757.
- Humphreys, E. D., 1995, Post-Laramide removal of the Farallon slab, western United States: *Geology*, v. 23, p. 987–990.
- Irving, A. J., O'Brien, H. E., and McCallum, I. S., 1989, Montana potassic volcanism: Geochemical evidence for interaction of asthenospheric melts and metasomatically veined Precambrian subcontinental mantle lithosphere: *New Mexico Bureau of Mines and Mineral Resources Bulletin*, v. 131, p. 140.
- Jacob, A. F., Ray, R. R., and Terbest, H., Jr., 1988, Laramide tectonics of the Wet Mountains and southeastern Front Range, Colorado, and evolution of the Denver Basin and the Rocky Mountains: *Geological Society of America Abstracts with Programs*, v. 20, no. [xx], p. 384.
- Johnson, C. M., and Thompson, R. A., 1991, Isotopic composition of Oligocene mafic volcanic rocks in the Northern Rio Grande rift: Evidence for contributions of ancient intraplate and subduction magmatism to evolution of the lithosphere: *Journal of Geophysical Research*, v. 96, p. 13 593–13 608.
- Johnson, R. B., 1968, Geology of igneous rocks of the Spanish Peaks region, Colorado: U.S. Geological Survey Professional Paper 594-G, 47 p.
- Kelley, S. A., and Duncan, I. J., 1986, Late Cretaceous to middle Tertiary tectonic history of the northern Rio Grande rift, New Mexico: *Journal of Geophysical Research*, v. 91, p. 6246–6262.
- Kempton, P. D., Harmon, R. S., Hawkesworth, C. J., and Moorbath, S., 1990, Petrology and geochemistry of lower crustal granulites from the Geronimo Volcanic Field, southeastern Arizona: *Geochimica et Cosmochimica Acta*, v. 54, p. 3401–3426.

- Kempton, P. D., Fitton, J. G., Hawkesworth, C. J., and Omerod, D. S., 1991, Isotopic and trace element constraints on the composition and evolution of the lithosphere beneath the southwestern United States: *Journal of Geophysical Research*, v. 96, p. 13 713–13 735.
- Knopf, A., 1936, Igneous geology of the Spanish Peaks region, Colorado: *Geological Society of America Bulletin*, v. 47, p. 1727–1784.
- Lambert, D. D., Shirey, S. B., and Bergman, S. C., 1995, Proterozoic lithospheric mantle source for the Prairie Creek lamproites: Re-Os and Sm-Nd isotopic evidence: *Geology*, v. 23, p. 273–277.
- Leat, P. T., Thompson, R. N., Morrison, M. A., Hendry, G. L., and Dickin, A. P., 1988, Silicic magmas derived by fractional crystallization from Miocene minette, Elkhead Mountains, Colorado: *Mineralogical Magazine*, v. 52, p. 577–585.
- Leat, P. T., Thompson, R. N., Morrison, M. A., Hendry, G. L., and Dickin, A. P., 1990, Geochemistry of mafic lavas in the early Rio Grande rift, Harmony Mountain, Colorado, U.S.A.: *Chemical Geology*, v. 81, p. 23–43.
- Lee, D.-K., and Grand, S. P., 1996, Upper mantle shear structure beneath the Colorado Rocky Mountains: *Journal of Geophysical Research* (in press).
- Leeman, W. P., Menzies, M. A., Matty, D. J., and Embree, G. F., 1985, Strontium, neodymium and lead isotopic compositions of deep crustal xenoliths from the Snake River Plain: Evidence for Archean basement: *Earth and Planetary Science Letters*, v. 75, p. 354–368.
- Le Maitre, R. W., ed., 1989, *A classification of igneous rocks and glossary of terms*: Oxford, United Kingdom, Blackwell, 193 p.
- Lipman, P. W., 1987, Rare-earth-element compositions of Cenozoic volcanic rocks in the southern Rocky Mountains and adjacent areas: *U.S. Geological Survey Bulletin* 1668, 21 p.
- Lipman, P. W., and Mehnert, H. H., 1975, Late Cenozoic basaltic volcanism and development of the Rio Grande depression in the Southern Rocky Mountains, *in* Curtis, B. F., ed., *Cenozoic history of the Southern Rocky Mountains*: *Geological Society of America Memoir* 144, p. 119–154.
- Lipman, P. W., Prostka, H. J., and Christiansen, R. L., 1971, Evolving subduction zones in the western United States, as interpreted from igneous rocks: *Science*, v. 174, p. 821–825.

- Lipman, P. W., Prostka, H. J., and Christiansen, R. L., 1972, Cenozoic volcanism and plate-tectonic evolution of the western United States. 1. Early and middle Cenozoic: Royal Society of London Philosophical Transactions, ser. A, v. 271, p. 217–248.
- McDowell, F. W., 1971, K-Ar ages of igneous rocks from the western United States: Isochron/West, no. 2, p. 1–16.
- McKenzie, D., 1989, Some remarks on the movement of small melt fractions in the mantle: Earth and Planetary Science Letters, v. 95, p. 53–72.
- Menzies, M. A., 1989, Cratonic, circumcratonic and oceanic mantle domains beneath the western United States: Journal of Geophysical Research, v. 94, p. 7899–7915.
- Molnar, P., and England, P., 1990, Late Cenozoic uplift of mountain ranges and global climate change: Chicken or egg?: Nature, v. 346, p. 29–34.
- Muehlberger, W. R., Hedge, C. E., Denison, R. E., and Marvin, R. F., 1966, Geochronology of the Midcontinent region, United States: Journal of Geophysical Research, v. 71, p. 5409–5426.
- Nelson, B. K., and DePaolo, D. J., 1988, Rapid production of continental crust 1.7 to 1.9 b.y. ago: Nd isotopic evidence from the basement of the North American mid-continent: Geological Society of America Bulletin, v. 96, p. 746–754.
- Nyquist, L. E., Shih, C. -Y., Wooden, J. L., Bansal, B. M., and Wiesman, H., 1979, The Sr and Nd isotopic record of Apollo 12 basalts: Implications for lunar geochemical evolution: Proceedings 10th Lunar and Planetary Sciences Conference: Houston, Texas, Land and Planetary Science Institute, p. 77–114.
- O'Brien, H. E., Irving, A. J., and McCallum, I. S., 1988a, Complex zoning and resorption of phenocrysts in mixed potassic mafic magmas of the Highwood Mountains, Montana: American Mineralogist, v. 73, p. 1007–1024.
- O'Brien, H. E., Irving, A. J., McCallum, I. S., and Thirlwall, M. F., 1988b, Characterization of source components of potassic mafic magmas of the Highwood Mountains Province [abs.]: Eos (Transactions, American Geophysical Union), v. 69, p. 519.
- O'Brien, H. E., Irving, A. J., and McCallum, I. S., 1991, Eocene potassic magmatism in the Highwood Mountains, Montana: Petrology, geochemistry, and tectonic implications: Journal of Geophysical Research, v. 96, p. 13 237–13 260.

- O'Brien, H. E., Irving, A. J., McCallum, I. S., and Thirlwall, M. F., 1995, Strontium, neodymium, and lead isotopic evidence for the interaction of post-subduction asthenospheric potassic mafic magmas of the Highwood Mountains, Montana, USA, with ancient Wyoming craton lithospheric mantle: *Geochimica et Cosmochimica Acta*, v. 59, p. 4539–4556.
- Penn, B. S., Snee, L. W., and Wendlandt, R. F., 1992,  $^{40}\text{Ar}/^{39}\text{Ar}$  geochronologic constraints on the intrusive history of the Spanish Peaks area in south-central Colorado [abs.]: *Eos (Transactions, American Geophysical Union)*, v. 73, p. 657.
- Phelps, D. W., Gust, D. A., and Wooden, J. L., 1983, Petrogenesis of the mafic feldspathoidal lavas of the Raton-Clayton volcanic field, New Mexico: *Contributions to Mineralogy and Petrology*, v. 84, p. 182–190.
- Pilione, L. J., Gold, D. P., and Kreiger, E. W., 1977, Fission track age of apatite from a lamprophyre dike in the Two Buttes igneous complex, southeastern CO: *Geological Society of America Abstracts with Programs*, v. 9, p. 641–642.
- Platt, J. P., and England, P. C., 1994, Convective removal of lithosphere beneath mountain belts: Thermal and mechanical consequences: *American Journal of Science*, v. 294, p. 307–336.
- Powell, J. L., and Bell, K., 1970, Strontium isotopic studies of alkalic rocks: Localities from Australia, Spain and the western United States: *Contributions to Mineralogy and Petrology*, v. 27, p. 1–10.
- Prodehl, C., and Lipman, P. W., 1989, Crustal structure of the Rocky Mountain region, *in* Pakiser, L. C., and Mooney, W. D., eds., *Geophysical framework of the continental United States: Geological Society of America Memoir 172*, p. 249–284.
- Roden, M. F., 1981, Origin of coexisting minette and ultramafic breccia, Navajo volcanic field: *Contributions to Mineralogy and Petrology*, v. 77, p. 195–206.
- Roden, M. F., Smith, D., and Murthy, V. R., 1990, Chemical constraints on lithosphere composition and evolution beneath the Colorado Plateau: *Journal of Geophysical Research*, v. 95, p. 2811–2831.
- Rollinson, H., 1993, *Using geochemical data: Evaluation, presentation, interpretation*: Singapore, Longman, 352 p.

- Rudnick, R. L., Irving, A. J., Ireland, T. R., 1993, Evidence for 1.8 Ga mantle metasomatism beneath the northwestern margin of the Wyoming craton from SHRIMP analyses of zircons in ultramafic xenoliths [abs.]: Eos (Transactions, American Geophysical Union), v. 74, p. 320.
- Scambos, T. A., and Farmer, G. L., 1988, Multiple source components for alkalic igneous rocks in the Wyoming Province: Isotopic and trace element evidence from central Montana [abs.]: Eos (Transactions, American Geophysical Union), v. 66, p. 1510.
- Scott, G. R., 1986, Geologic and structure contour map of the Springer 30' x 60' quadrangle, Colfax, Harding, Mora, and Union counties, New Mexico: U.S. Geological Survey Map I-1705, scale 1: [xxx].
- Scott, G. R., Wilcox, R. E., and Mehnert, H. H., 1990, Geology of volcanic and subvolcanic rocks of the Raton-Springer area, Colfax and Union counties, New Mexico: U.S. Geological Survey Professional Paper 1507, 58 p.
- Severinghaus, J., and Atwater, T., 1990, Cenozoic geometry and thermal state of the subducting slabs beneath western North America, *in* Wernicke, B. P., ed., Basin and Range extension tectonics near the latitude of Las Vegas, Nevada: Geological Society of America Memoir 176, p. 1–22.
- Smith, R. P., 1973, Age and emplacement structures of Spanish Peaks dikes, south-central Colorado: Geological Society of America Abstracts with Programs, v. 5, p. 513–514.
- Smith, R. P., 1975, Structure and petrology of Spanish Peaks dikes, south-central Colorado [Ph.D. dissert.]: Boulder, University of Colorado, 191 p.
- Smith, R. P., 1979, Early rift magmatism at Spanish Peaks, Colorado, *in* Riecker, R. E., ed., Rio Grande Rift: Tectonics and magmatism: Washington, D.C., American Geophysical Union, p. 313–321.
- Smith, D., Griffin, W. L., Ryan, C. G., and Sie, S. H., 1991, Trace-element zonation in garnets from The Thumb: Heating and melt infiltration below the Colorado Plateau: Contributions to Mineralogy and Petrology, v. 107, p. 60–79.
- Staatz, M. H., 1985, Geology and description of the thorium and rare-earth veins in the Laughlin Peak area, Colfax County, New Mexico: U.S. Geological Survey Professional Paper 1049-E, 32 p.
- Stacey, J. S., and Kramers, J. D., 1975, Approximation of terrestrial lead isotopic evolution by a 2 stage model: Earth and Planetary Science Letters, v. 26, p. 207–221.



- Stobbe, H. R., 1949, Petrology of volcanic rocks of northeastern New Mexico: Geological Society of America Bulletin, v. 60, p. 1041–1093.
- Stormer, J. C., 1972, Ages and nature of volcanic activity on the southern high plains, New Mexico and Colorado: Geological Society of America Bulletin, v. 83, p. 2443–2448.
- Sun, S.-S., 1980, Lead isotopic study of young volcanic rocks from mid-ocean ridges, ocean islands and island arcs: Royal Society of London Philosophical Transactions, ser. A, v. 297, p. 409–445.
- Sun, S.-S., and McDonough, W. F., 1989, Chemical and isotopic systematics of oceanic basalts: Implications for mantle composition and processes, *in* Saunders, A. D., and Norry, M. J., eds., Magmatism in the ocean basins: Geological Society of London Special Publication [xx], p. 313–345.
- Taylor, S. R., and McLennan, S. M., 1985, The continental crust: Its composition and evolution: Boston, Massachusetts, Blackwell Scientific, 312 p.
- Thompson, R. N., Morrison, M. A., Hendry, G. L., and Parry, S. J., 1984, An assessment of the relative roles of crust and mantle in magma genesis: An elemental approach: Royal Society of London Philosophical Transactions, ser. A, v. 310, p. 549–590.
- Thompson, R. N., Leat, P. T., Dickin, A. P., Morrison, M. A., Hendry, G. L., and Gibson, S. A., 1989, Strongly potassic mafic magmas from lithospheric mantle sources during continental extension and heating: Evidence from Miocene minettes of northwest Colorado, U.S.A.: Earth and Planetary Science Letters, v. 98, p. 139–153.
- Tingey, D. G., Christiansen, E. H., Best, M. G., Ruiz, J., and Lux, D. R., 1991, Tertiary minette and melanephelinite dikes, Wasatch Plateau, Utah: Records of mantle heterogeneities and changing tectonics: Journal of Geophysical Research, v. 96, p. 13 529–13 544.
- Vollmer, R., Ogden, P., Schilling, J. G., Kingley, R. H., and Waggoner, D. G., 1984, Nd and Sr isotopes in ultra-potassic volcanic rocks from the Leucite Hills, Wyoming: Contributions to Mineralogy and Petrology, v. 87, p. 359–368.
- Walker, N., 1992, Middle Proterozoic geologic evolution of Llano uplift, Texas: Evidence from U-Pb zircon geochronometry: Geological Society of America Bulletin, v. 104, p. 494–504.
- Weaver, B. L., and Tarney, J., 1981, Lewisian geochemistry and Archean crustal development models: Earth and Planetary Science Letters, v. 55, p. 171–180.

Wilson, M., 1988, *Igneous petrogenesis*: London, Unwin Hyman Ltd., 466 p.

Zhu, J., Stormer, J. C., and Wright, J. E., 1993, Petrogenesis of late Cenozoic volcanic rocks from the Raton-Clayton volcanic field, northeastern New Mexico and southeastern Colorado: *Geological Society of America Abstracts with Programs*, v. 25, no. 5, p. 170.

Zindler, A., and Hart, S. R., 1986, Chemical geodynamics: *Annual Review of Earth and Planetary Sciences*, v. 14, p. 493–571.
